# Supplementary material
Source: publisher site journal article supplement (http://www.spandidos-publications.com/5922/downloadSupplementary)
Supplement: Supplementary file 1 [file downloadSupplementary]

## Sheet: Sheet1
Table SII. Coefficient values of normalized expression levels of three prognostic genes
Gene	Coefficient
TFR2	0.278921
RGS4	0.112813
ZFP36	0.0106204
TFR2; transferrin receptor 2; RGS4, regulator of G protein signalling 4; ZFP36, zinc finger protein 36.
